# Supplementary material for: Activating Inducible T-cell Costimulator Yields Antitumor Activity Alone and in Combination with Anti-PD-1 Checkpoint Blockade
Source: PubMed Central journal article supplement (PMC10430783; doi:10.1158/2767-9764.crc-22-0293), 2023-08-16
Supplement: crc-22-0293-s04.pdf [file crc-22-0293-s04.pdf]

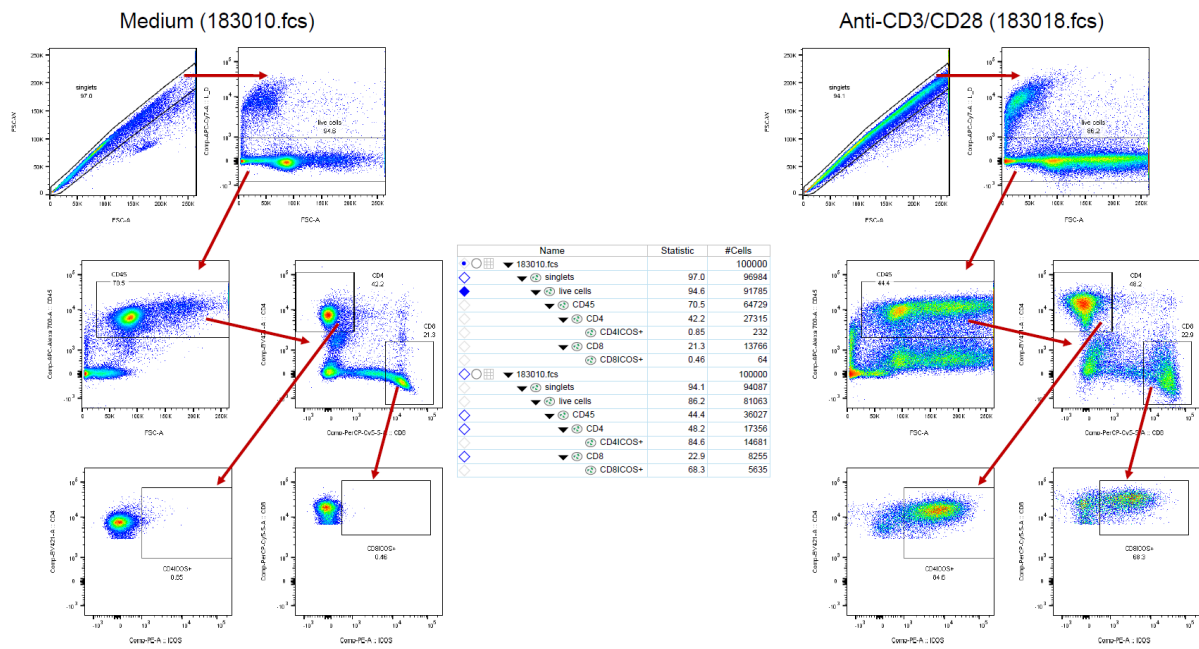

**Supplementary Fig. 1. Exemplar flow cytometry gating strategy.** Associated with Fig. 1a, Fig. 2a, e, f, Fig. 3c, e, f, Supplementary Fig. 6f and Supplementary Fig. 10f. Example shown for ICOS.
