# Supplementary material for: Activating Inducible T-cell Costimulator Yields Antitumor Activity Alone and in Combination with Anti-PD-1 Checkpoint Blockade
Source: PubMed Central journal article supplement (PMC10430783; doi:10.1158/2767-9764.crc-22-0293), 2023-08-16
Supplement: crc-22-0293-s05.pdf [file crc-22-0293-s05.pdf]

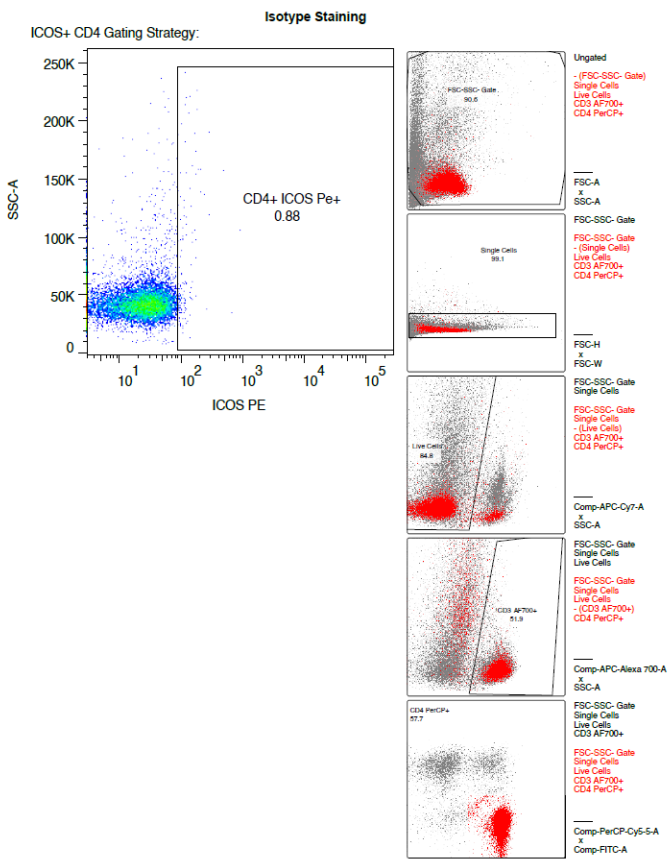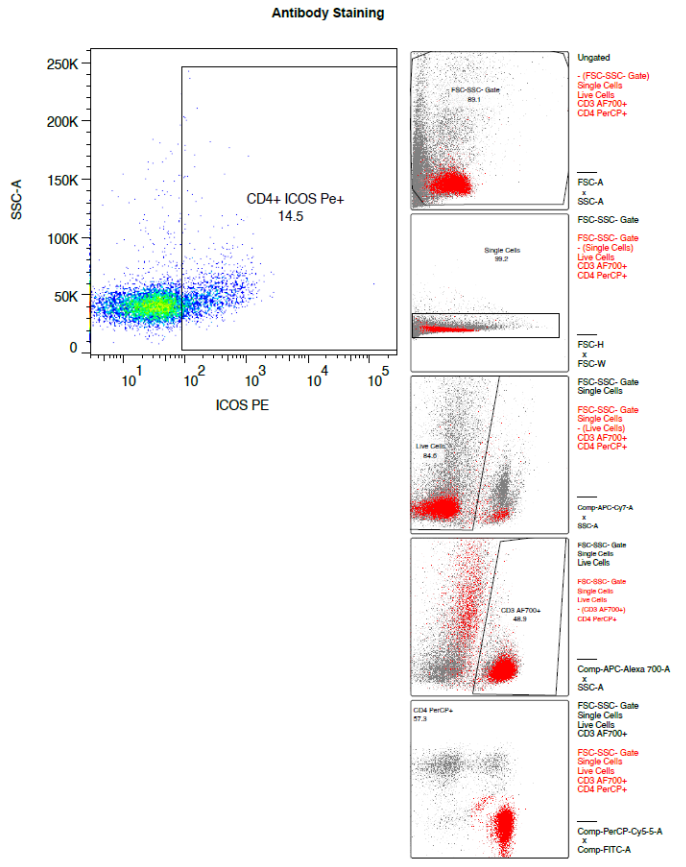

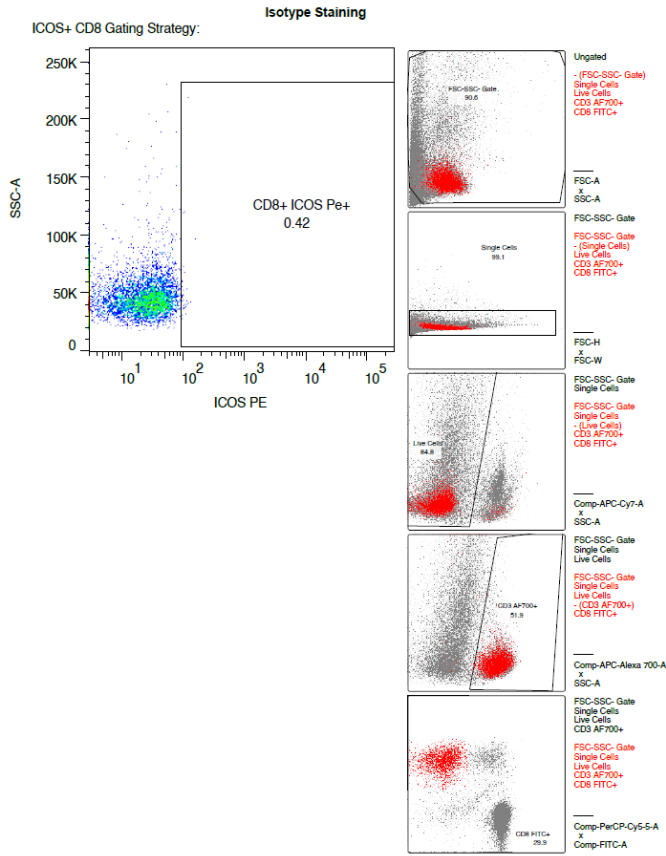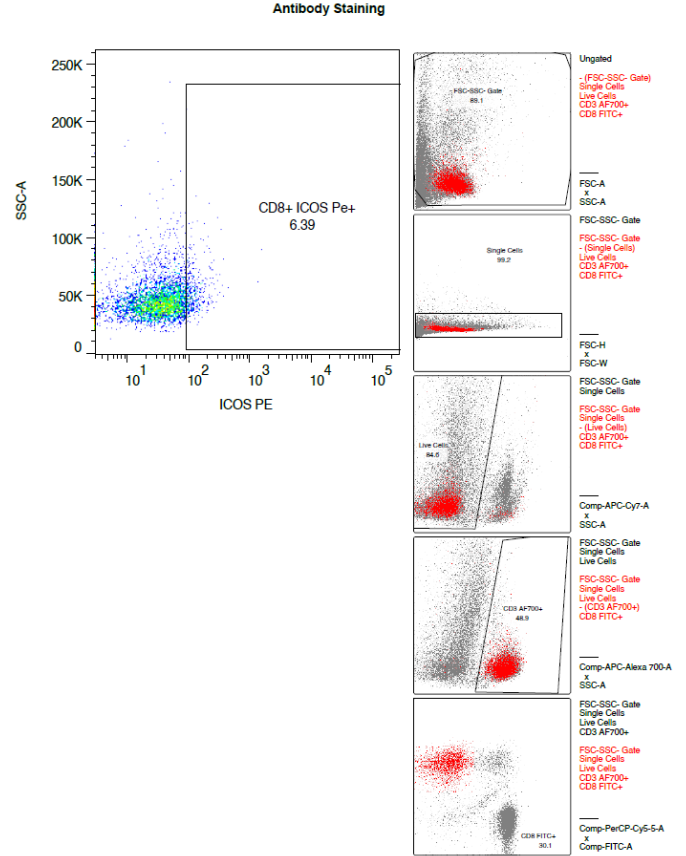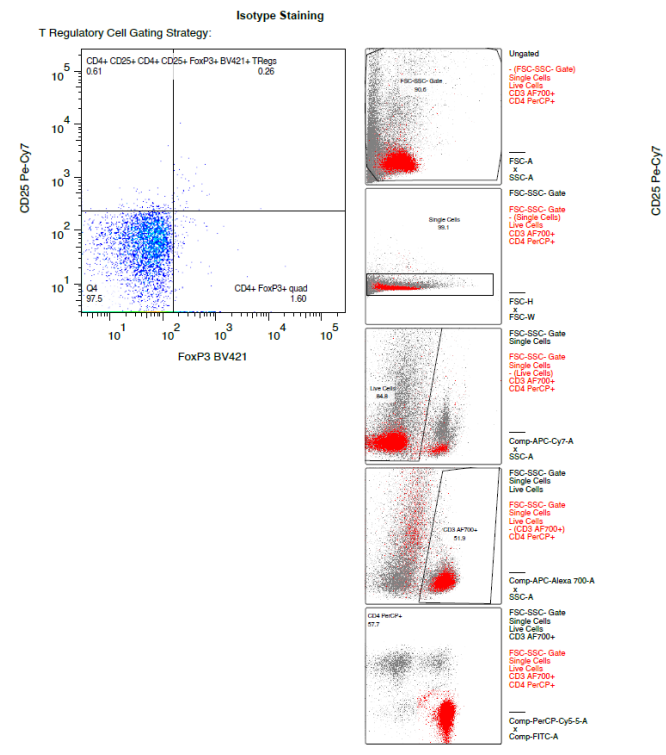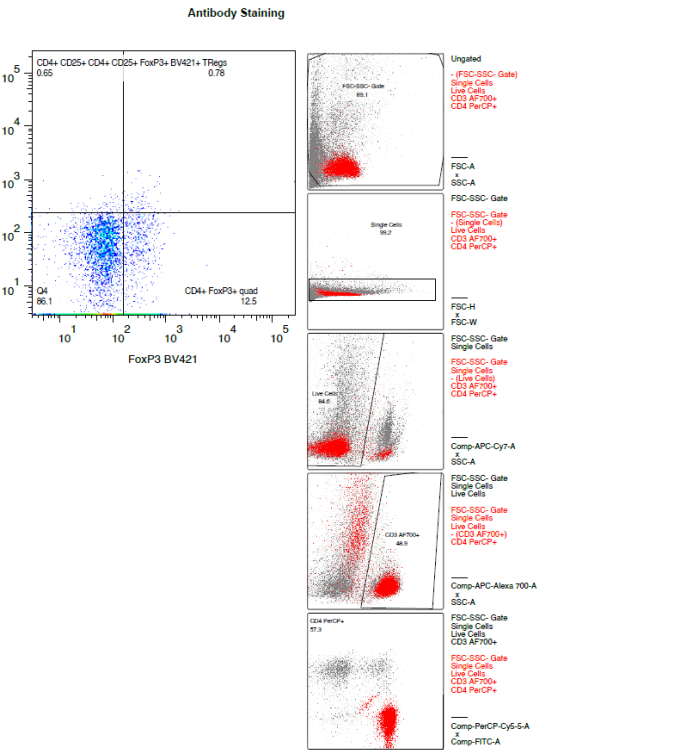

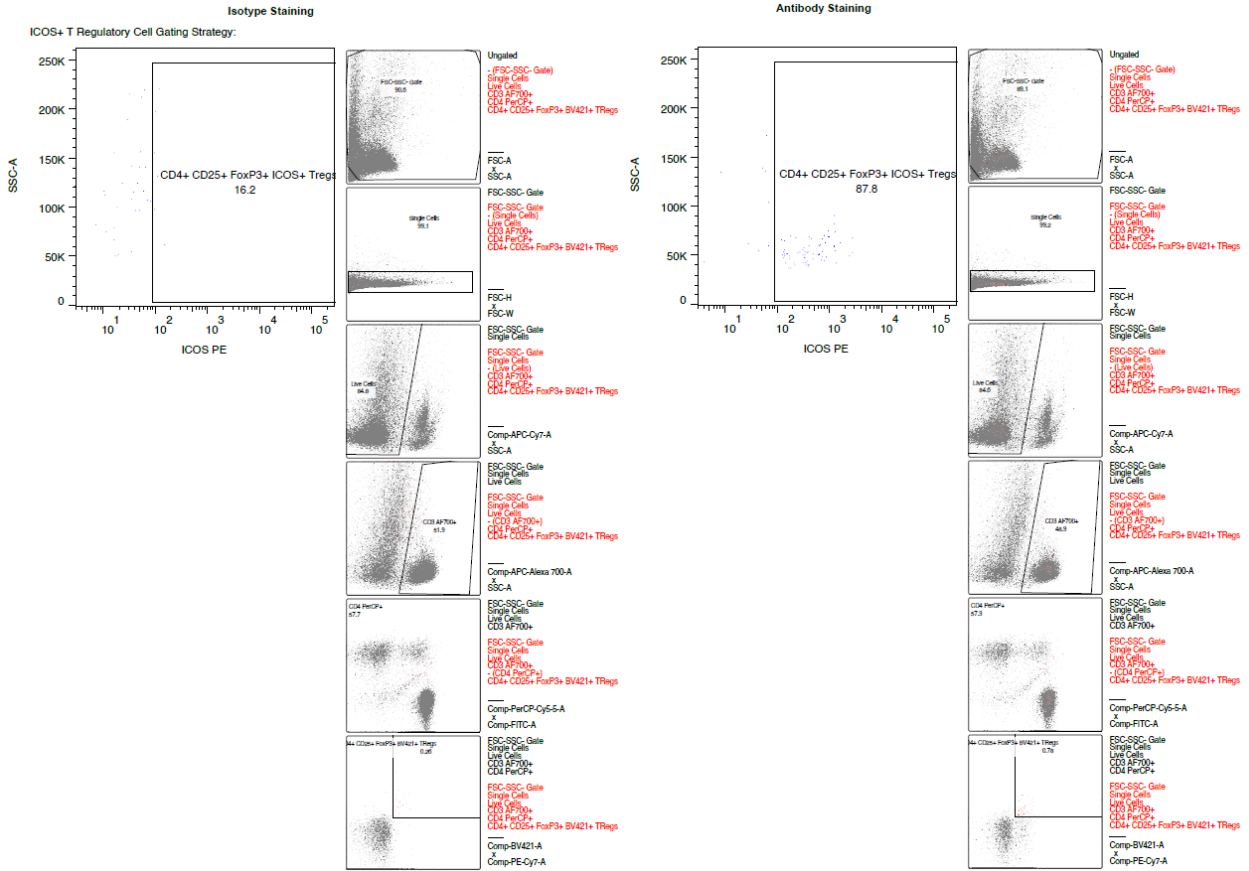

**Supplementary Fig. 2. Flow cytometry gating strategy for ICOS on individual T cell populations. Associated with Fig. 1d, e.**
