# Supplementary material for: Activating Inducible T-cell Costimulator Yields Antitumor Activity Alone and in Combination with Anti-PD-1 Checkpoint Blockade
Source: PubMed Central journal article supplement (PMC10430783; doi:10.1158/2767-9764.crc-22-0293), 2023-08-16
Supplement: crc-22-0293-s06.pdf [file crc-22-0293-s06.pdf]

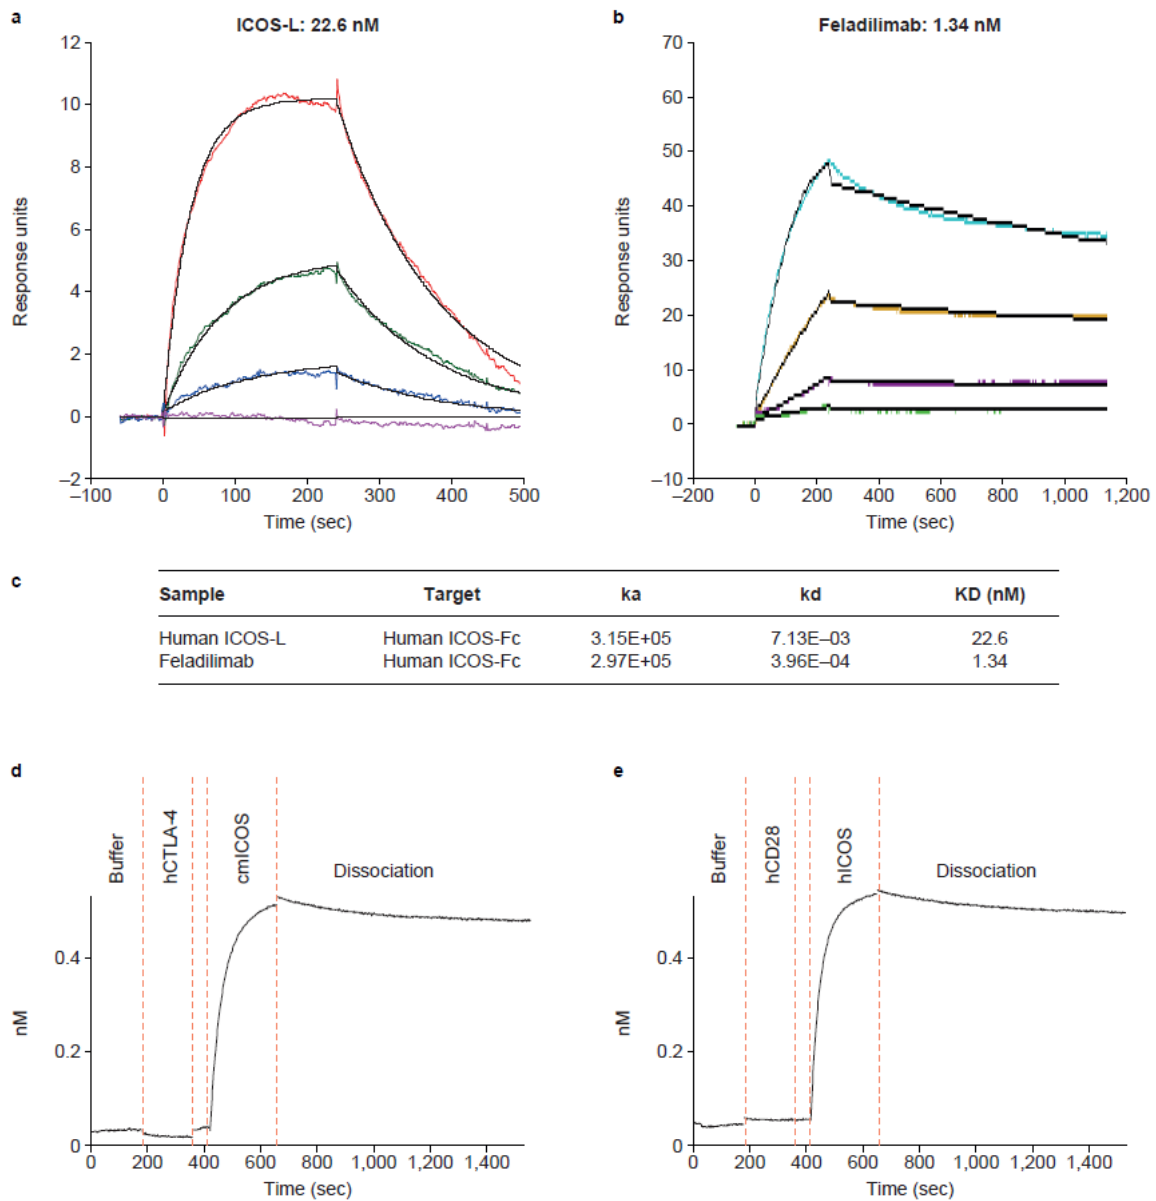

**Supplementary Fig. 3.** Affinity and kinetics of (a) recombinant human ICOS-L or (b) feladilimab binding to rabbit Fc-tagged recombinant human or cynomolgus monkey ICOS were determined using SPR. (c) Tabulation of the association ( $k_a$ ,  $M^{-1}s^{-1}$ ), dissociation ( $k_d$ ,  $s^{-1}$ ), and equilibrium (KD, nM) constants for feladilimab and ICOS-L binding to recombinant human ICOS (hICOS). (d, e) Binding kinetics of feladilimab (Fc variant: hIgG1) to (d) recombinant

human CTLA-4 (hCTLA-4) and (e) recombinant human CD28 (hCD28), as determined by Octet. In (d), cmICOS refers to recombinant cynomolgus monkey ICOS. Data in (d, e) are normalized to reference sensor (buffer only).
