# Supplementary material for: Activating Inducible T-cell Costimulator Yields Antitumor Activity Alone and in Combination with Anti-PD-1 Checkpoint Blockade
Source: PubMed Central journal article supplement (PMC10430783; doi:10.1158/2767-9764.crc-22-0293), 2023-08-16
Supplement: crc-22-0293-s07.pdf [file crc-22-0293-s07.pdf]

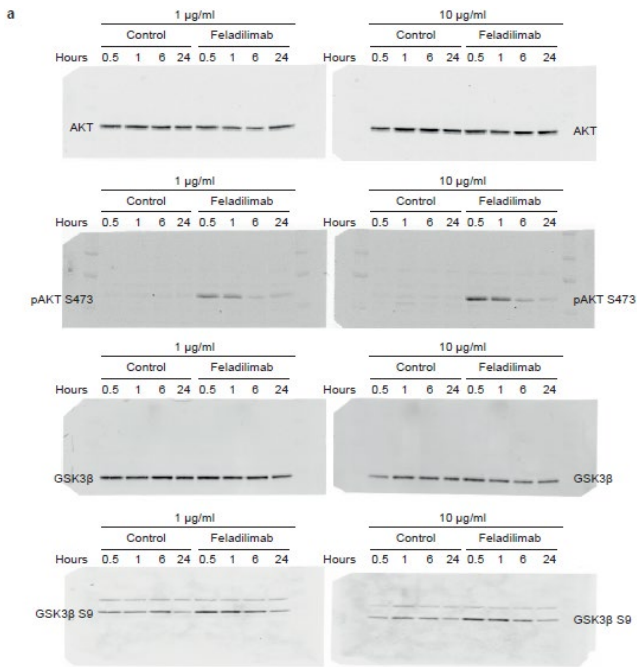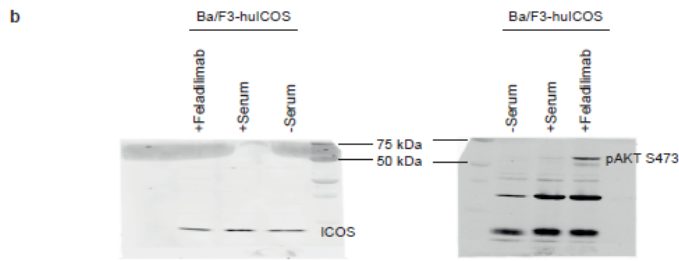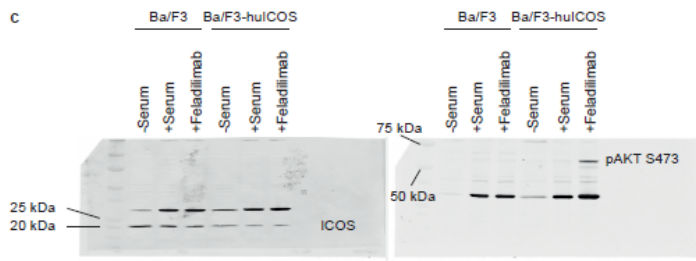

**Supplementary Fig. 4.** Uncropped gel images for (a) **Fig. 2d**, (b) **Supplementary Fig. 5a**, and (c) **Supplementary Fig. 5b**.
