# Supplementary material for: Activating Inducible T-cell Costimulator Yields Antitumor Activity Alone and in Combination with Anti-PD-1 Checkpoint Blockade
Source: PubMed Central journal article supplement (PMC10430783; doi:10.1158/2767-9764.crc-22-0293), 2023-08-16
Supplement: crc-22-0293-s09.pdf [file crc-22-0293-s09.pdf]

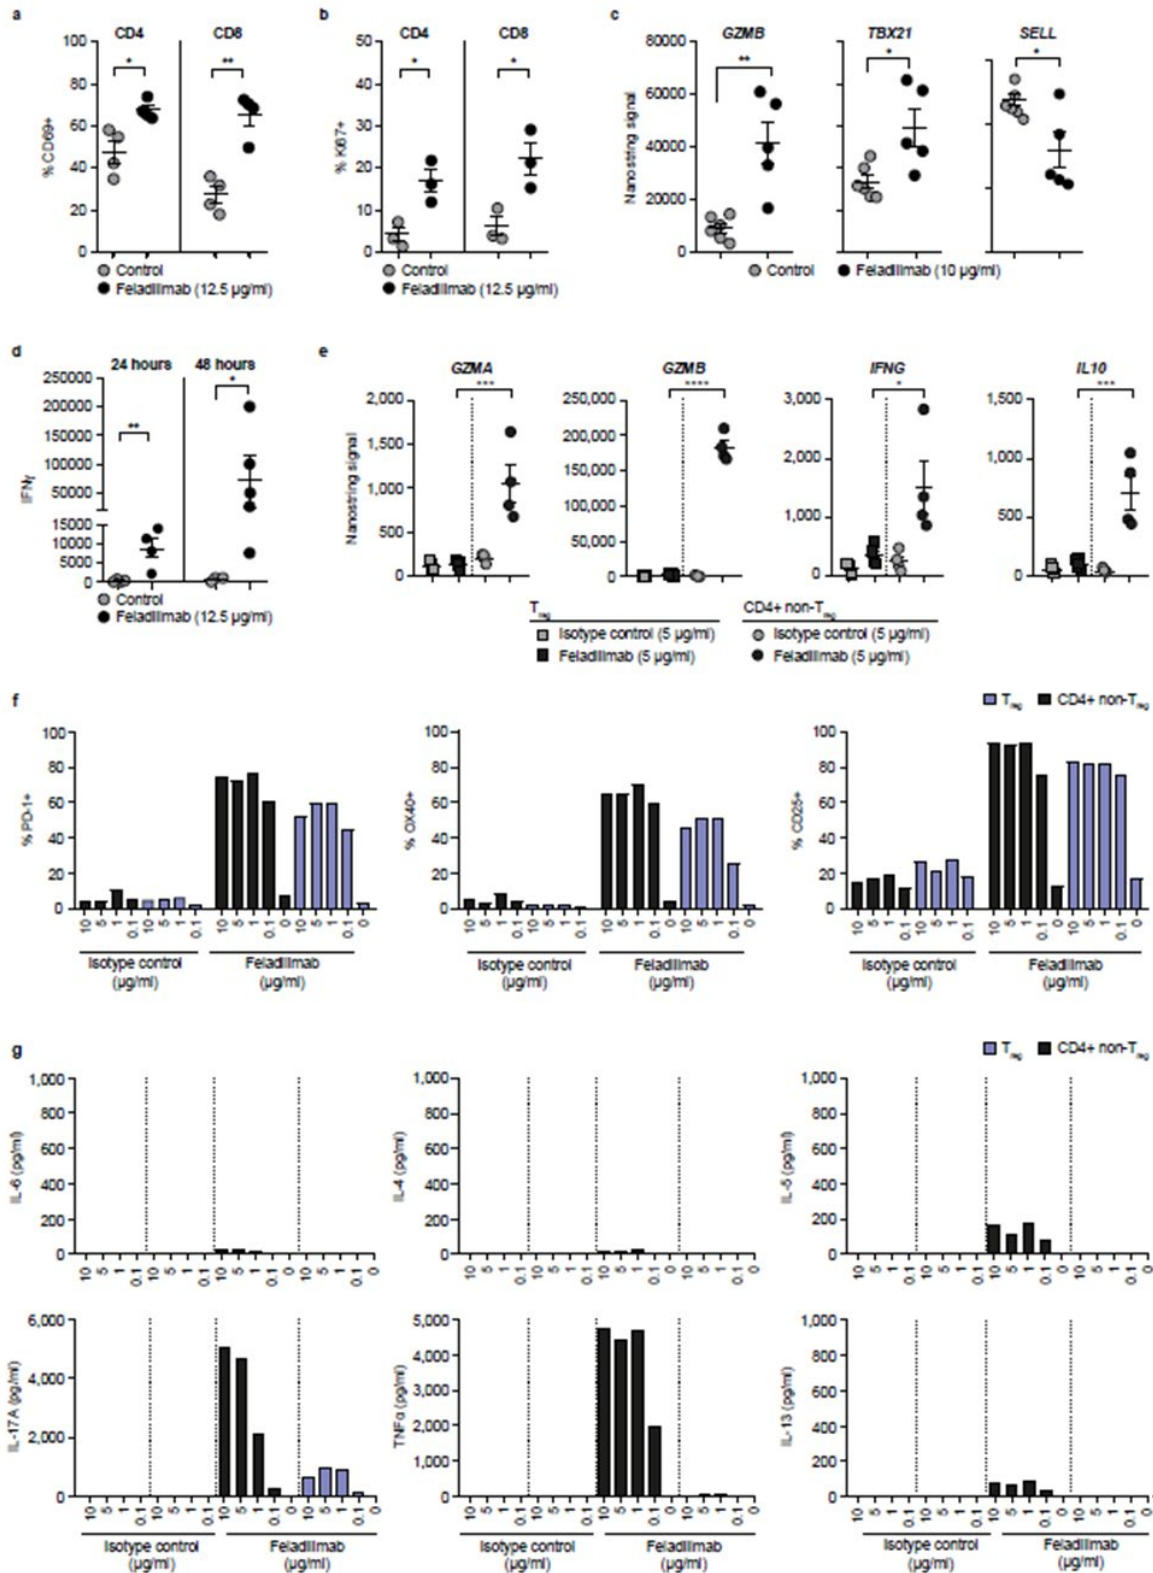

Supplementary Fig. 6. Feladilimab-mediated ICOS co-stimulation results in differential phenotypic changes and cytokine production in CD4+ non-T<sub>reg</sub> and T<sub>reg</sub> populations.

Flow cytometry-based expression of (a) CD69 and (b) Ki67 on healthy donor PBMCs following concurrent exposure to plate-bound anti-CD3 (0.6  $\mu\text{g/ml}$ ) and feladilimab or isotype control (12.5  $\mu\text{g/ml}$ ) for 48 hours. (c) RNA-based analysis of *GZMB*, *TBX21*, and *SELL* expression in purified CD3<sup>+</sup> T cells following concurrent exposure to plate-bound anti-CD3 (0.6  $\mu\text{g/ml}$ ) and feladilimab or isotype control (10  $\mu\text{g/ml}$ ) for 24 hours. (d) IFN $\gamma$  production in the supernatant of PBMC cultures from healthy donors following plate-bound feladilimab and anti-CD3 (0.6  $\mu\text{g/ml}$ ) stimulation (24 and 48 hours for healthy donors; 72 hours for NSCLC patients). (e) RNA-based analysis (Nanostring) of effector cell/functional marker (*GZMA*, *GZMB*, *TFNG*, *IL10*) expression by the stimulated cell subsets (each symbol represents an individual donor). (f-g) As illustrated in **Fig. 2e**, CD4<sup>+</sup> non-T<sub>reg</sub> (CD4<sup>+</sup> CD25<sup>-</sup>) and T<sub>reg</sub> cells (CD4<sup>+</sup> CD25<sup>+</sup> CD127<sub>low</sub>) were isolated from healthy donor peripheral blood and stimulated using plate-bound anti-CD3 (1  $\mu\text{g/ml}$ )  $\pm$  feladilimab or isotype control (each at 5  $\mu\text{g/ml}$ ) for 72 hours. (f) Flow cytometry (nonspecific binding was blocked with human or mouse Fc block) and (g) cytokine-based analysis of T cell subsets following stimulation with plate-bound anti-CD3 and a dose range of feladilimab or isotype control; see **Supplementary Fig. 1** for gating strategy. Data in (a–d) represent the mean  $\pm$  s.e.m; significance determined by unpaired Student's *t*-test.
