# Supplementary material for: Activating Inducible T-cell Costimulator Yields Antitumor Activity Alone and in Combination with Anti-PD-1 Checkpoint Blockade
Source: PubMed Central journal article supplement (PMC10430783; doi:10.1158/2767-9764.crc-22-0293), 2023-08-16
Supplement: crc-22-0293-s10.pdf [file crc-22-0293-s10.pdf]

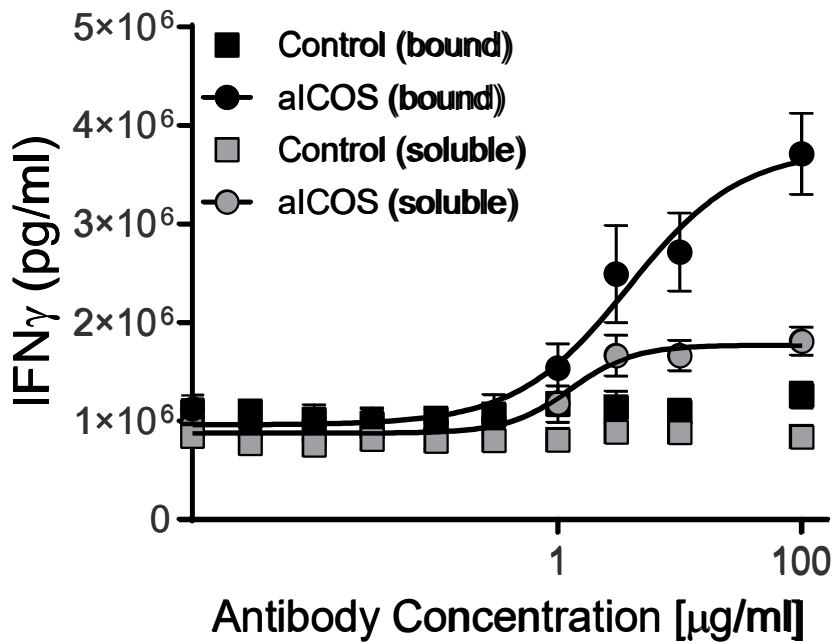

**Supplementary Fig. 7.** Healthy human donor CD4<sup>+</sup> T cells were pre-activated with anti-CD3/CD28 for 48 hours and then re-stimulated with plate-bound anti-CD3 in the presence of increasing concentrations of soluble or plate-bound feladilimab or isotype control for 72 hours. IFN $\gamma$  levels were then assessed from cell-free supernatants using Meso Scale Discovery (MSD)-based detection. Error bars represent mean  $\pm$  standard deviation; significance determined by unpaired student's *t*-test.
