# Supplementary material for: Activating Inducible T-cell Costimulator Yields Antitumor Activity Alone and in Combination with Anti-PD-1 Checkpoint Blockade
Source: PubMed Central journal article supplement (PMC10430783; doi:10.1158/2767-9764.crc-22-0293), 2023-08-16
Supplement: crc-22-0293-s12.pdf [file crc-22-0293-s12.pdf]

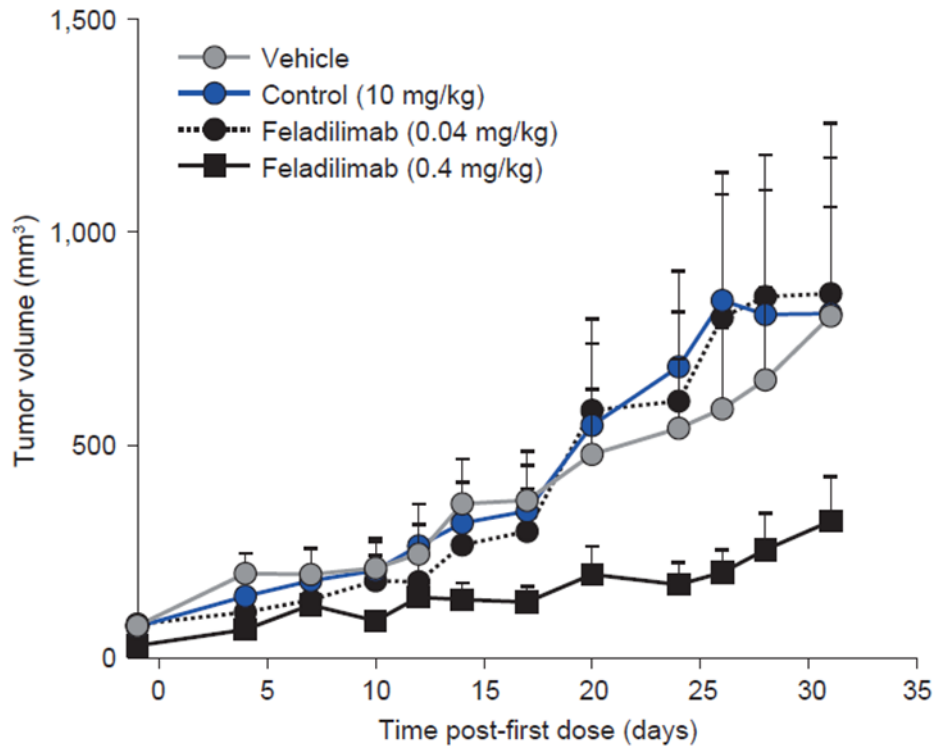

**Supplementary Fig. 9. Antitumor activity of feladilimab in a humanized patient-derived xenograft model of triple-negative breast cancer.** Following human CD34<sup>+</sup> HPSC engraftment, female NSG mice (n=7–8/group) were implanted with breast cancer tumors (BR1126) and administered i.p. with feladilimab or control when tumors reached an average tumor volume of ~70 mm<sup>3</sup>. Human CD34<sup>+</sup> HPSC-engrafted mice were added to the study on a rolling basis. Each group represents the mean tumor volume (mm<sup>3</sup>) ± s.e.m. at each evaluable time point.
