# Supplementary material for: Activating Inducible T-cell Costimulator Yields Antitumor Activity Alone and in Combination with Anti-PD-1 Checkpoint Blockade
Source: PubMed Central journal article supplement (PMC10430783; doi:10.1158/2767-9764.crc-22-0293), 2023-08-16
Supplement: crc-22-0293-s14.pdf [file crc-22-0293-s14.pdf]

a

| Monotherapy case study |                                                                                                                      |
|------------------------|----------------------------------------------------------------------------------------------------------------------|
| Disease/stage          | <ul style="list-style-type: none"><li>• Stage IIIc nodular melanoma</li><li>• BRAF/c-KIT mutation negative</li></ul> |
| Prior treatment        | <ul style="list-style-type: none"><li>• Ipilimumab/nivolumab ~ 2 months</li><li>• Nivolumab ~1 year</li></ul>        |
| Study treatment        | Feladilimab 1 mg/kg and 3 mg/kg for 48 weeks                                                                         |
| Response               | Partial response followed by stable disease                                                                          |

b

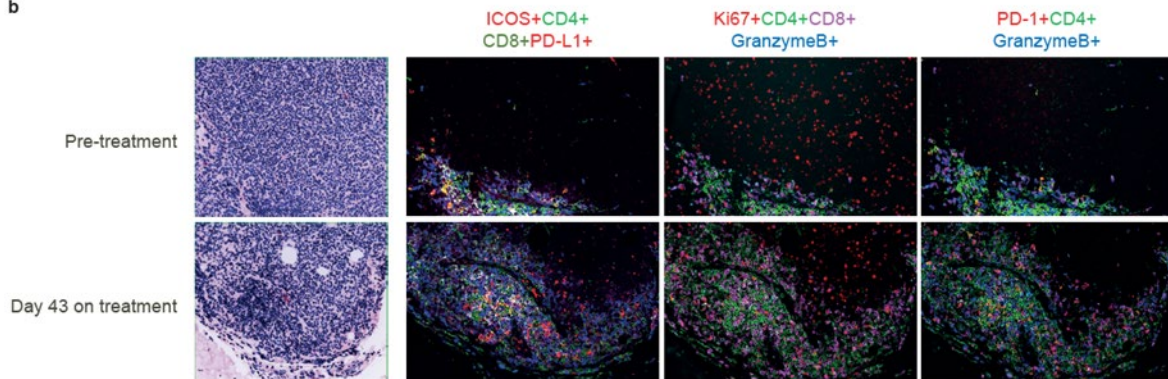

**Supplementary Fig. 11. Clinical case study of feladilimab monotherapy.** (a) Clinical history, treatment details, and response for a patient with melanoma who received feladilimab monotherapy and (b) corresponding tumor pharmacodynamic data. See **Supplementary Fig. 12a** for CT imaging of tumor lesions for this patient.
