# Supplementary material for: Activating Inducible T-cell Costimulator Yields Antitumor Activity Alone and in Combination with Anti-PD-1 Checkpoint Blockade
Source: PubMed Central journal article supplement (PMC10430783; doi:10.1158/2767-9764.crc-22-0293), 2023-08-16
Supplement: crc-22-0293-s16.pdf [file crc-22-0293-s16.pdf]

**Supplementary Table 1. Antibodies used for *in vitro* and *in vivo* assays, and experimental models**

| <b>Assay</b>   | <b>Antibody</b>      | <b>Clone</b> | <b>Manufacturer</b> | <b>RRID</b>                                                          |
|----------------|----------------------|--------------|---------------------|----------------------------------------------------------------------|
| Flow cytometry | CD4<br>(anti-human)  | RPA-T4       | BD Biosciences      | BD Biosciences<br>Cat# 560468,<br>RRID:AB_1645271                    |
|                | CD4<br>(anti-mouse)  | RM4-5        | BD Biosciences      | BD Biosciences<br>Cat# 550954,<br>RRID:AB_393977                     |
|                | CD8<br>(anti-human)  | RPA-T8       | BioLegend           | BioLegend Cat#<br>301032,<br>RRID:AB_893422                          |
|                | CD8<br>(anti-mouse)  | 53-6.7       | BD Biosciences      | BD Biosciences<br>Cat# 560182,<br>RRID:AB_1645237                    |
|                | CD69<br>(anti-human) | FN50         | BioLegend           | BioLegend Cat#<br>310911,<br>RRID:AB_314846                          |
|                | Ki67<br>(anti-human) | B56          | BD Biosciences      | BD Biosciences<br>Cat# 556026,<br>RRID:AB_396302                     |
|                | Ki67<br>(anti-mouse) | 16A8         | BioLegend           | BioLegend Cat#<br>652420,<br>RRID:AB_2564285                         |
|                | ICOS<br>(anti-human) | ISA3         | eBioscience         | Thermo Fisher<br>Scientific Cat# 12-<br>9948-42,<br>RRID:AB_10732348 |

|  |                       |          |                    |                                                                     |
|--|-----------------------|----------|--------------------|---------------------------------------------------------------------|
|  | ICOS<br>(anti-mouse)  | C398.4a  | BioLegend          | BioLegend Cat#<br>313524,<br>RRID:AB_2562545                        |
|  | FOXP3<br>(anti-human) | PCH101   | eBioscience        | Thermo Fisher<br>Scientific Cat# 12-<br>4776-42,<br>RRID:AB_1518782 |
|  | FOXP3<br>(anti-mouse) | Fjk-16s  | eBioscience        | Thermo Fisher<br>Scientific Cat# 17-<br>5773-82,<br>RRID:AB_469457  |
|  | PD-1<br>(anti-human)  | EH12.2H7 | BioLegend          | BioLegend Cat#<br>329908,<br>RRID:AB_940475                         |
|  | PD-1<br>(anti-mouse)  | RMP1-30  | BioLegend          | BioLegend Cat#<br>109110,<br>RRID:AB_57201                          |
|  | CD25<br>(anti-human)  | BC96     | BiolegendBioLegend | BioLegend Cat#<br>302632,<br>RRID:AB_11218989                       |
|  | CD25<br>(anti-mouse)  | PC61     | BD Biosciences     | BD Biosciences<br>Cat# 552880,<br>RRID:AB_394509                    |
|  | CD45<br>(anti-human)  | H130     | BD Biosciences     | BD Biosciences<br>Cat# 560566,<br>RRID:AB_1645452                   |
|  | CD45<br>(anti-mouse)  | 30-F11   | BD Biosciences     | BD Biosciences<br>Cat# 563053,<br>RRID:AB_2737976                   |

|              |                              |          |                              |                                                                      |
|--------------|------------------------------|----------|------------------------------|----------------------------------------------------------------------|
|              | CD3<br>(anti-human)          | UCHT1    | BioLegend                    | BioLegend Cat#<br>300424,<br>RRID:AB_493741                          |
|              | CD3<br>(anti-mouse)          | 145-2C11 | BD Biosciences               | BD Biosciences<br>Cat# 553062,<br>RRID:AB_394595                     |
|              | T-bet<br>(anti-mouse)        | O4-46    | BD Biosciences               | BD Biosciences<br>Cat# 561268,<br>RRID:AB_10564071                   |
|              | granzyme B<br>(anti-mouse)   | GB11     | BioLegend                    | BioLegend Cat#<br>515405,<br>RRID:AB_2294995                         |
|              | CD127<br>(anti-mouse)        | A7R34    | BioLegend                    | BioLegend Cat#<br>135012,<br>RRID:AB_1937216                         |
|              | CD44<br>(anti-mouse)         | IM7      | BioLegend                    | BioLegend Cat#<br>103039,<br>RRID:AB_10895752                        |
|              | OX40<br>(anti-human)         | ACT35    | eBioscience                  | Thermo Fisher<br>Scientific Cat# 11-<br>1347-42,<br>RRID:AB_10597448 |
| Western blot | pAKT<br>(S473 and<br>Thr308) | D9E      | Cell Signaling<br>Technology | Cell Signaling<br>Technology Cat#<br>4060,<br>RRID:AB_2315049        |
|              | Total AKT                    | 9272     | Cell Signaling<br>Technology | Cell Signaling<br>Technology Cat#                                    |

|                    |                                           |                                |                              |                                                                   |
|--------------------|-------------------------------------------|--------------------------------|------------------------------|-------------------------------------------------------------------|
|                    |                                           |                                |                              | 9272,<br>RRID:AB_329827                                           |
|                    | pGSK3 $\beta$<br>(Ser9)                   | D85E12                         | Cell Signaling<br>Technology | Cell Signaling<br>Technology Cat#<br>5558,<br>RRID:AB_10013750    |
|                    | Total GSK3 $\beta$                        | D5C5Z                          | Cell Signaling<br>Technology | Cell Signaling<br>Technology Cat#<br>12456,<br>RRID:AB_2636978    |
|                    | ICOS (human-<br>mouse cross-<br>reactive) | ab133680<br>(polyclonal<br>Ab) | Abcam                        | Discontinued, not in<br>system                                    |
| Immunofluorescence | ICOS                                      | SP98                           | Abcam                        | Abcam Cat#<br>ab105227,<br>RRID:AB_10710236                       |
|                    | PD-1                                      | EPR4877(2)                     | Abcam                        | Abcam Cat#<br>ab137132,<br>RRID:AB_2894867                        |
|                    | PD-L1                                     | SP142                          | Abcam                        | Abcam Cat#<br>ab228462,<br>RRID:AB_2827816                        |
|                    | OX40/CD134                                | Ber-ACT35                      | BioLegend                    | BioLegend Cat#<br>350002,<br>RRID:AB_10639951                     |
|                    | CD16                                      | DJ130c                         | ThermoFisher                 | Thermo Fisher<br>Scientific Cat#<br>MA1-84008,<br>RRID:AB_2104009 |

|  |                |               |               |                                                       |
|--|----------------|---------------|---------------|-------------------------------------------------------|
|  | CD56           | MRQ-42        | Cell Marque   | Nolan lab - Stanford<br>Cat# 156R,<br>RRID:AB_2864402 |
|  | Ki67           | SP6           | SpringBio     | Spring Bioscience<br>Cat# M3061,<br>RRID:AB_1661312   |
|  | HLA-DR         | WR18          | Novus         | Novus Cat# NB100-<br>64358,<br>RRID:AB_964563         |
|  | granzyme B     | GrB-7         | Dako          | Agilent Cat# M7235,<br>RRID:AB_2114697                |
|  | CD8            | C8/144B       | Dako          | Agilent Cat# M7103,<br>RRID:AB_2075537                |
|  | CD3            | F7.2.38       | Dako          | Agilent Cat# M7254,<br>RRID:AB_2631163                |
|  | CD4            | EPR6855       | Abcam         | Abcam Cat#<br>ab133616,<br>RRID:AB_2750883            |
|  | S100           | Polyclonal Ab | Dako          | Agilent Cat#<br>GA50461-2,<br>RRID:AB_2811056         |
|  | PanCytokeratin | PCK-26        | Sigma-Aldrich | Sigma-Aldrich<br>Cat# C5992,<br>RRID:AB_2134432       |

|                          |                        |                |                        |                                          |
|--------------------------|------------------------|----------------|------------------------|------------------------------------------|
| Experimental models      | <b>Cell line</b>       | <b>Species</b> | <b>Source</b>          | <b>RRID</b>                              |
|                          | EMT6                   | Mouse          | ATCC                   | ATCC Cat# CRL-2755, RRID:CVCL_1923       |
|                          | A549                   | Human          | ATCC                   | RRID:CVCL_0023                           |
|                          | A2058                  | Human          | ATCC                   | RRID:CVCL_1059                           |
|                          | BR1126 (TNBC PDX)      | Human          | The Jackson Laboratory | None, patient-derived                    |
|                          | BA/F3                  | Mouse          | DSMZ                   | DSMZ Cat# ACC-300, RRID:CVCL_0161        |
|                          | <b>Mice</b>            | <b>Use</b>     | <b>Source</b>          | <b>RRID</b>                              |
|                          | BALB/c                 | Syngeneic      | Harlan/Envigo          | RRID:IMSR_APB:4790                       |
|                          | NOD SCID gamma (NSG)   | Humanized      | The Jackson Laboratory | RRID:IMSR_JAX:005557                     |
| <i>In vivo</i> treatment | <b>Antibody</b>        | <b>Clone</b>   | <b>Manufacturer</b>    | <b>RRID</b>                              |
|                          | ICOS                   | 7E.17G9 rIgG2b | BioXcell               | Bio X Cell Cat# BE0059, RRID:AB_1107622  |
|                          | ICOS                   | 7E.17G9 mIgG1  | Absolute Antibody      | Custom                                   |
|                          | PD-1                   | RMP1-14 rIgG2a | BioXcell               | Bio X Cell Cat# BE0146, RRID:AB_10949053 |
|                          | rIgG2b isotype control | LTF2           | BioXcell               | Bio X Cell Cat# BE0090, RRID:AB_1107780  |
|                          | mIgG1 isotype control  | MOPC21         | BioXcell               | Bio X Cell Cat# BE0083, RRID:AB_1107784  |

|  |                              |     |          |                                            |
|--|------------------------------|-----|----------|--------------------------------------------|
|  | rIgG2a<br>isotype<br>control | 2A3 | BioXcell | Bio X Cell Cat# BE0089,<br>RRID:AB_1107769 |
|--|------------------------------|-----|----------|--------------------------------------------|
