# Supplementary material for: Activating Inducible T-cell Costimulator Yields Antitumor Activity Alone and in Combination with Anti-PD-1 Checkpoint Blockade
Source: PubMed Central journal article supplement (PMC10430783; doi:10.1158/2767-9764.crc-22-0293), 2023-08-16
Supplement: crc-22-0293-s20.pdf [file crc-22-0293-s20.pdf]

**Supplementary Table 5.** Pearson correlation (r) analysis of *ICOS* versus PD-L1 (*CD274*) in different tumor types

| <b>Indication</b>                      | <b>r</b> | <b>P value</b> |
|----------------------------------------|----------|----------------|
| <b>ICOS vs CD274 r value ranking</b>   |          |                |
| BRCA                                   | 0.6248   | 0              |
| BLCA                                   | 0.4408   | 0              |
| LUAD                                   | 0.3931   | 0              |
| SKCM                                   | 0.3931   | 4.01E-05       |
| PAAD                                   | 0.3661   | 5.03E-07       |
| HNSC                                   | 0.3611   | 0              |
| ESCA                                   | 0.2878   | 7.43E-05       |
| CESC                                   | 0.2638   | 3.11E-06       |
| SARC                                   | 0.2516   | 4.20E-05       |
| LUSC                                   | 0.1864   | 2.68E-05       |
| <b>ICOS vs ICOSLG r value ranking</b>  |          |                |
| PAAD                                   | 0.3455   | 2.32E-06       |
| LUSC                                   | 0.3185   | 2.85E-13       |
| HNSC                                   | 0.2901   | 1.53E-11       |
| CESC                                   | 0.2323   | 4.31E-05       |
| SKCM                                   | 0.2157   | 0.028685259    |
| BRCA                                   | 0.1708   | 1.07E-08       |
| LUAD                                   | 0.1698   | 8.78E-05       |
| ESCA                                   | 0.1549   | 0.035793078    |
| BLCA                                   | 0.1271   | 0.009925008    |
| SARC                                   | 0.1137   | 0.067779107    |
| <b>ICOSLG vs CD274 r value ranking</b> |          |                |
| LUAD                                   | 0.0869   | 0.045958733    |
| BRCA                                   | 0.0826   | 0.005991044    |
| CESC                                   | 0.05     | 0.385013142    |
| SKCM                                   | 0.045    | 0.651732174    |
| LUSC                                   | 0.0316   | 0.480256577    |
| HNSC                                   | 0.0098   | 0.82325339     |
| PAAD                                   | -0.0076  | 0.919604834    |
| BLCA                                   | -0.0205  | 0.679178622    |
| SARC                                   | -0.0512  | 0.411526463    |
| ESCA                                   | -0.1333  | 0.071278803    |

Key:

| <b>Correlation</b> | <b>r range</b> |
|--------------------|----------------|
| Strong positive    | 0.5-1          |
| Moderate positive  | 0.3-0.49       |
| Low positive       | 0.1-0.29       |
| Minimal            | 0-0.09         |

BLCA, bladder cancer (n=411); BRCA, breast cancer (n=1107); CESC, cervical cancer (n=304); ESCA, esophageal cancer (n=184); HNSC, head and neck squamous cell carcinoma (n=520); LUAD, lung adenocarcinoma (n=528); LUSC, lung squamous cell carcinoma (n=501); PAAD, pancreatic cancer (n=178); SARC, sarcoma (n=259); SKCM, melanoma (n=103). Values in parentheses represent the number of patient specimens per indication.
