# Supplementary material for: Activating Inducible T-cell Costimulator Yields Antitumor Activity Alone and in Combination with Anti-PD-1 Checkpoint Blockade
Source: PubMed Central journal article supplement (PMC10430783; doi:10.1158/2767-9764.crc-22-0293), 2023-08-16
Supplement: crc-22-0293-s21.pdf [file crc-22-0293-s21.pdf]

**Supplementary Table 6. Example TIL marker expression phenotypes from clinical patient case studies of feladilimab monotherapy and in combination with pembrolizumab**

| Phenotype<br>(cells/mm <sup>2</sup> ) | Fig 5b<br>(monotherapy) |                  | Fig 5c<br>(combination with<br>pembrolizumab) |                  | Supplementary Fig 11<br>(monotherapy) |                  |
|---------------------------------------|-------------------------|------------------|-----------------------------------------------|------------------|---------------------------------------|------------------|
|                                       | Pre-<br>treatment       | On-<br>treatment | Pre-<br>treatment                             | On-<br>treatment | Pre-<br>treatment                     | On-<br>treatment |
| CD3+                                  | 19                      | 241              | 320                                           | 2435             | 224                                   | 2669             |
| CD3+CD4+                              | 14                      | 148              | 80                                            | 642              | 71                                    | 908              |
| CD3+CD8+                              | 0                       | 72               | 167                                           | 1520             | 137                                   | 1449             |
| CD16+CD56+                            | 0                       | 0                | 36                                            | 52               | 5                                     | 33               |
| CD3+CD8+<br>GRANZYMEB+                | 0                       | 23               | 44                                            | 421              | 61                                    | 470              |
| PD1+                                  | 0                       | 23               | 146                                           | 1074             | 111                                   | 1240             |
| PDL1+                                 | 0                       | 62               | 8042                                          | 1108             | 170                                   | 1020             |
| CD3+CD8+HLADR+                        | 0                       | 26               | 44                                            | 1018             | 36                                    | 433              |
| Ki67+                                 | 715                     | 833              | 2707                                          | 280              | 2260                                  | 1701             |
| CD3+CD8+Ki67+                         | 0                       | 10               | 29                                            | 80               | 36                                    | 215              |
| CD3+CD4+Ki67+                         | 0                       | 12               | 7                                             | 25               | 9                                     | 84               |
| CD3+CD4+FOXP3+<br>Ki67+               | 0                       | 6                | 7                                             | 5                | 5                                     | 39               |
| CD3+CD4+CD134+                        | 0                       | 23               | 22                                            | 79               | 21                                    | 310              |
| CD3+CD8+CD134+                        | 0                       | 2                | 15                                            | 51               | 8                                     | 180              |
